# Supplementary material for: Comparison of Detailed and Simplified Models of Human Atrial Myocytes to Recapitulate Patient Specific Properties
Source: PLOS journal article supplement (doi:10.1371/journal.pcbi.1005060), 2016-08-05

**S2 Figure. CV restitution curves for the remaining patients.** Shown is the CV as a function of DI for patients 1, 2, 4, and 5. The equivalent curve for patient 3 is shown in Fig. 2D.

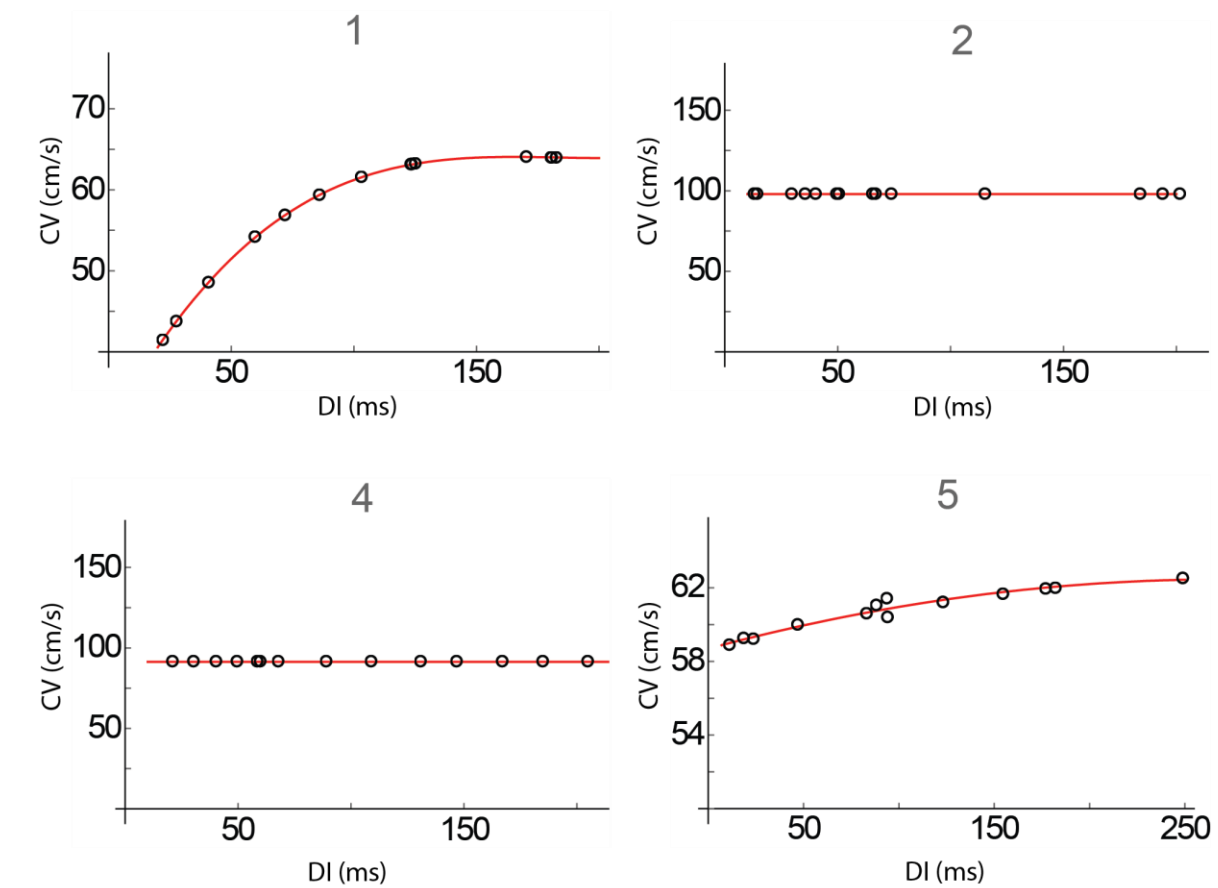

Supplement: S3 (10.1371/journal.pcbi.1005060.s003) [file journal.pcbi.1005060.s003]
